# Supplementary material
Source: PubMed Central journal article supplement (PMC3685172)
Supplement: NIHMS260501-supplement-01.pdf [file NIHMS260501-supplement-01.pdf]

| m/z    |  | Bound Fraction |      |         |      |         |      |                 |              |                |              |
|--------|--|----------------|------|---------|------|---------|------|-----------------|--------------|----------------|--------------|
|        |  | NC             |      | QT      |      | HCC     |      | NC vs QT        |              | NC vs HCC      |              |
|        |  | Rel Int        | SEM  | Rel Int | SEM  | Rel Int | SEM  | P-value         | AUC          | P-value        | AUC          |
| 1579.8 |  | 1.46           | 0.17 | 1.67    | 0.17 | 1.56    | 0.10 | 0.382           |              | 0.631          |              |
| 1590.7 |  | 0.42           | 0.04 | 0.50    | 0.03 | 0.58    | 0.04 | 0.119           |              | <b>0.00829</b> | <b>0.729</b> |
| 1620.8 |  | 0.21           | 0.02 | 0.25    | 0.01 | 0.23    | 0.02 | 0.122           |              | 0.65           |              |
| 1661.7 |  | 0.60           | 0.06 | 0.73    | 0.06 | 0.85    | 0.07 | 0.136           |              | <b>0.00724</b> | <b>0.717</b> |
| 1783.9 |  | 1.30           | 0.16 | 1.44    | 0.16 | 1.30    | 0.11 | 0.514           |              | 0.965          |              |
| 1824.9 |  | 0.25           | 0.02 | 0.32    | 0.02 | 0.34    | 0.02 | <b>0.0157</b>   | <b>0.690</b> | <b>0.0082</b>  | <b>0.707</b> |
| 1865.9 |  | 1.11           | 0.07 | 1.38    | 0.08 | 1.49    | 0.08 | <b>0.0147</b>   | <b>0.677</b> | <b>0.00131</b> | <b>0.734</b> |
| 1981.9 |  | 0.21           | 0.01 | 0.20    | 0.01 | 0.19    | 0.01 | 0.349           |              | 0.264          |              |
| 1987.9 |  | 0.43           | 0.04 | 0.51    | 0.04 | 0.49    | 0.03 | 0.151           |              | 0.24           |              |
| 2029.0 |  | 0.16           | 0.01 | 0.22    | 0.01 | 0.22    | 0.01 | <b>8.98E-04</b> | <b>0.778</b> | <b>0.00397</b> | <b>0.780</b> |
| 2070.0 |  | 0.78           | 0.04 | 1.03    | 0.05 | 0.93    | 0.08 | <b>2.15E-04</b> | <b>0.759</b> | 0.115          |              |
| 2192.1 |  | 0.53           | 0.05 | 0.61    | 0.06 | 0.59    | 0.05 | 0.32            |              | 0.433          |              |
| 2396.2 |  | 0.19           | 0.01 | 0.20    | 0.01 | 0.20    | 0.01 | 0.53            |              | 0.634          |              |
| 2401.2 |  | 0.86           | 0.03 | 0.90    | 0.04 | 0.89    | 0.04 | 0.365           |              | 0.453          |              |
| 2519.3 |  | 0.14           | 0.01 | 0.16    | 0.01 | 0.16    | 0.03 | <b>0.0248</b>   | <b>0.654</b> | 0.396          |              |
| 2635.2 |  | 0.38           | 0.01 | 0.40    | 0.01 | 0.39    | 0.02 | 0.198           |              | 0.648          |              |
| 2663.2 |  | 0.37           | 0.02 | 0.40    | 0.01 | 0.40    | 0.02 | 0.209           |              | 0.269          |              |
| 2850.4 |  | 2.36           | 0.10 | 2.59    | 0.12 | 2.60    | 0.14 | 0.656           |              | 0.168          |              |
| 2880.4 |  | 0.77           | 0.03 | 0.66    | 0.02 | 0.65    | 0.04 | <b>0.00846</b>  | <b>0.317</b> | <b>0.0166</b>  | <b>0.300</b> |
| 2966.5 |  | 3.90           | 0.17 | 3.51    | 0.18 | 4.18    | 0.18 | 0.895           |              | 0.872          |              |
| 3037.3 |  | 0.45           | 0.02 | 0.41    | 0.02 | 0.38    | 0.02 | 0.119           |              | 0.275          |              |

|        |  |      |      |      |      |      |      |                 |              |                 |              |
|--------|--|------|------|------|------|------|------|-----------------|--------------|-----------------|--------------|
| 3241.6 |  | 1.28 | 0.08 | 0.91 | 0.04 | 0.86 | 0.05 | <b>2.34E-04</b> | <b>0.246</b> | <b>1.11E-04</b> | <b>0.241</b> |
| 3385.6 |  | 0.15 | 0.01 | 0.14 | 0.00 | 0.16 | 0.00 | 0.146           |              | 0.722           |              |
| 3690.8 |  | 0.32 | 0.03 | 0.24 | 0.01 | 0.25 | 0.02 | <b>0.00505</b>  | <b>0.262</b> | <b>0.0484</b>   | <b>0.340</b> |
| 3776.9 |  | 2.73 | 0.30 | 1.61 | 0.15 | 2.62 | 0.27 | <b>0.00146</b>  | <b>0.279</b> | 0.751           |              |
| 3864.9 |  | 0.21 | 0.01 | 0.19 | 0.01 | 0.23 | 0.01 | 0.131           |              | 0.295           | 0.581        |
| 3951.0 |  | 0.33 | 0.03 | 0.24 | 0.01 | 0.42 | 0.04 | <b>0.0136</b>   | <b>0.333</b> | 0.0692          |              |
| 3963.9 |  | 0.15 | 0.00 | 0.14 | 0.01 | 0.15 | 0.01 | 0.245           |              | 0.498           |              |
| 4052.0 |  | 0.37 | 0.04 | 0.29 | 0.02 | 0.28 | 0.02 | 0.037           |              | 0.0417          |              |
| 4226.1 |  | 0.25 | 0.01 | 0.21 | 0.01 | 0.29 | 0.02 | 0.0516          |              | 0.0857          |              |
| 4413.2 |  | 0.52 | 0.07 | 0.25 | 0.01 | 0.38 | 0.03 | 0.522           |              | 0.0963          |              |
| 4587.3 |  | 0.35 | 0.02 | 0.31 | 0.02 | 0.46 | 0.04 | 0.138           |              | 0.0241          |              |
| 4675.6 |  | 0.15 | 0.00 | 0.15 | 0.00 | 0.15 | 0.00 | 0.611           |              | 0.275           |              |
| 4761.4 |  | 0.22 | 0.01 | 0.22 | 0.01 | 0.39 | 0.04 | 0.916           |              | <b>4.89E-05</b> | <b>0.783</b> |

|
