# Supplementary material
Source: PubMed Central journal article supplement (PMC3685172)
Supplement: NIHMS260501-supplement-02.pdf [file NIHMS260501-supplement-02.pdf]

| m/z    |  | Flow-through |       |         |       |         |       |                 |              |                 |              |
|--------|--|--------------|-------|---------|-------|---------|-------|-----------------|--------------|-----------------|--------------|
|        |  | NC           |       | QT      |       | HCC     |       | NC vs QT        |              | NC vs HCC       |              |
|        |  | Rel Int      | SEM   | Rel Int | SEM   | Rel Int | SEM   | P-value         | AUC          | P-value         | AUC          |
| 1579.8 |  | 2.000        | 0.196 | 2.946   | 0.272 | 2.625   | 0.233 | <b>0.00651</b>  | <b>0.696</b> | <b>0.0444</b>   | <b>0.643</b> |
| 1590.7 |  | 0.088        | 0.008 | 0.076   | 0.004 | 0.119   | 0.008 | 0.195           |              | <b>0.00691</b>  | <b>0.767</b> |
| 1620.8 |  | 0.108        | 0.007 | 0.101   | 0.005 | 0.139   | 0.009 | 0.378           |              | <b>6.02E-04</b> | <b>0.741</b> |
| 1661.7 |  | 0.085        | 0.005 | 0.073   | 0.004 | 0.102   | 0.009 | 0.0684          |              | 0.0897          |              |
| 1783.9 |  | 1.867        | 0.156 | 2.065   | 0.160 | 2.010   | 0.153 | 0.379           |              | 0.515           |              |
| 1824.9 |  | 0.127        | 0.008 | 0.150   | 0.011 | 0.218   | 0.021 | 0.0854          |              | <b>1.77E-04</b> | <b>0.768</b> |
| 1865.9 |  | 0.139        | 0.009 | 0.146   | 0.009 | 0.187   | 0.014 | 0.565           |              | <b>0.00662</b>  | <b>0.693</b> |
| 1981.9 |  | 0.316        | 0.024 | 0.386   | 0.017 | 0.353   | 0.019 | <b>0.0213</b>   | <b>0.678</b> | 0.226           |              |
| 1987.9 |  | 0.383        | 0.031 | 0.544   | 0.052 | 0.553   | 0.044 | <b>0.0102</b>   | <b>0.669</b> | <b>2.45E-04</b> | <b>0.717</b> |
| 2029.0 |  | 0.120        | 0.009 | 0.160   | 0.010 | 0.215   | 0.021 | <b>0.00477</b>  | <b>0.734</b> | <b>7.39E-05</b> | <b>0.791</b> |
| 2070.0 |  | 0.232        | 0.017 | 0.309   | 0.014 | 0.619   | 0.209 | <b>6.88E-05</b> | <b>0.748</b> | 0.0698          |              |
| 2192.1 |  | 0.581        | 0.040 | 0.582   | 0.035 | 0.681   | 0.050 | 0.973           |              | 0.12            |              |
| 2396.2 |  | 1.018        | 0.070 | 0.755   | 0.036 | 0.864   | 0.052 | <b>0.00141</b>  | <b>0.274</b> | 0.0835          |              |
| 2401.2 |  | 0.420        | 0.026 | 0.456   | 0.029 | 0.508   | 0.031 | 0.348           |              | <b>0.033</b>    | <b>0.621</b> |
| 2519.3 |  | 0.119        | 0.009 | 0.146   | 0.009 | 0.209   | 0.047 | <b>0.0405</b>   | <b>0.733</b> | 0.064           |              |
| 2635.2 |  | 0.227        | 0.011 | 0.287   | 0.009 | 0.358   | 0.030 | <b>1.32E-04</b> | <b>0.786</b> | <b>1.11E-04</b> | <b>0.792</b> |
| 2663.2 |  | 0.179        | 0.007 | 0.210   | 0.007 | 0.261   | 0.017 | <b>0.00372</b>  | <b>0.714</b> | <b>4.78E-05</b> | <b>0.792</b> |
| 2850.4 |  | 0.933        | 0.067 | 1.135   | 0.078 | 1.373   | 0.115 | 0.0532          |              | <b>0.00163</b>  | <b>0.683</b> |
| 2880.4 |  | 0.650        | 0.020 | 0.685   | 0.017 | 0.757   | 0.030 | 0.195           |              | <b>0.00479</b>  | <b>0.668</b> |
| 2966.5 |  | 4.492        | 0.210 | 5.140   | 0.154 | 6.333   | 0.205 | <b>0.0463</b>   | <b>0.656</b> | <b>0.0248</b>   | <b>0.696</b> |
| 3037.3 |  | 0.511        | 0.032 | 0.494   | 0.025 | 0.777   | 0.053 | <b>0.680</b>    |              | <b>0.171</b>    |              |

|        |  |       |       |       |       |       |       |                 |              |                 |              |
|--------|--|-------|-------|-------|-------|-------|-------|-----------------|--------------|-----------------|--------------|
| 3241.6 |  | 1.333 | 0.057 | 1.195 | 0.039 | 1.182 | 0.074 | 0.0492          |              | 0.112           |              |
| 3385.6 |  | 0.163 | 0.009 | 0.157 | 0.007 | 0.228 | 0.016 | 0.623           |              | <b>8.05E-04</b> | <b>0.749</b> |
| 3690.8 |  | 0.653 | 0.035 | 0.502 | 0.021 | 0.612 | 0.047 | <b>4.59E-04</b> | <b>0.256</b> | 0.489           |              |
| 3776.9 |  | 5.588 | 0.550 | 3.354 | 0.265 | 5.823 | 0.409 | <b>5.54E-04</b> | <b>0.232</b> | 0.733           |              |
| 3864.9 |  | 0.395 | 0.019 | 0.339 | 0.013 | 0.553 | 0.032 | <b>0.0206</b>   | <b>0.327</b> | <b>9.14E-05</b> | <b>0.795</b> |
| 3951.0 |  | 0.548 | 0.045 | 0.393 | 0.028 | 0.813 | 0.065 | <b>0.00487</b>  | <b>0.289</b> | <b>0.0015</b>   | <b>0.738</b> |
| 3963.9 |  | 0.216 | 0.007 | 0.196 | 0.005 | 0.226 | 0.007 | <b>0.029</b>    | <b>0.384</b> | 0.3             |              |
| 4052.0 |  | 1.090 | 0.094 | 0.761 | 0.047 | 0.769 | 0.067 | <b>0.00268</b>  | <b>0.302</b> | <b>0.0072</b>   | <b>0.309</b> |
| 4226.1 |  | 0.602 | 0.053 | 0.408 | 0.025 | 0.759 | 0.057 | <b>0.00151</b>  | <b>0.254</b> | <b>0.0473</b>   | <b>0.674</b> |
| 4413.2 |  | 2.374 | 0.345 | 1.624 | 0.183 | 1.270 | 0.170 | <b>0.0598</b>   | <b>0.382</b> | <b>0.00575</b>  | <b>0.294</b> |
| 4587.3 |  | 1.387 | 0.148 | 0.757 | 0.065 | 1.369 | 0.186 | <b>2.61E-04</b> | <b>0.258</b> | 0.939           |              |
| 4675.6 |  | 0.211 | 0.007 | 0.202 | 0.005 | 0.223 | 0.010 | 0.278           |              | 0.347           |              |
| 4761.4 |  | 0.608 | 0.071 | 0.368 | 0.032 | 1.015 | 0.130 | <b>0.00292</b>  | <b>0.302</b> | <b>0.00782</b>  | <b>0.692</b> |
